# Supplementary material
Source: publisher site journal article supplement (https://www.dovepress.com/get_supplementary_file.php?f=409290.docx)
Supplement: Supplementary file 1 [file get_supplementary_file.php]

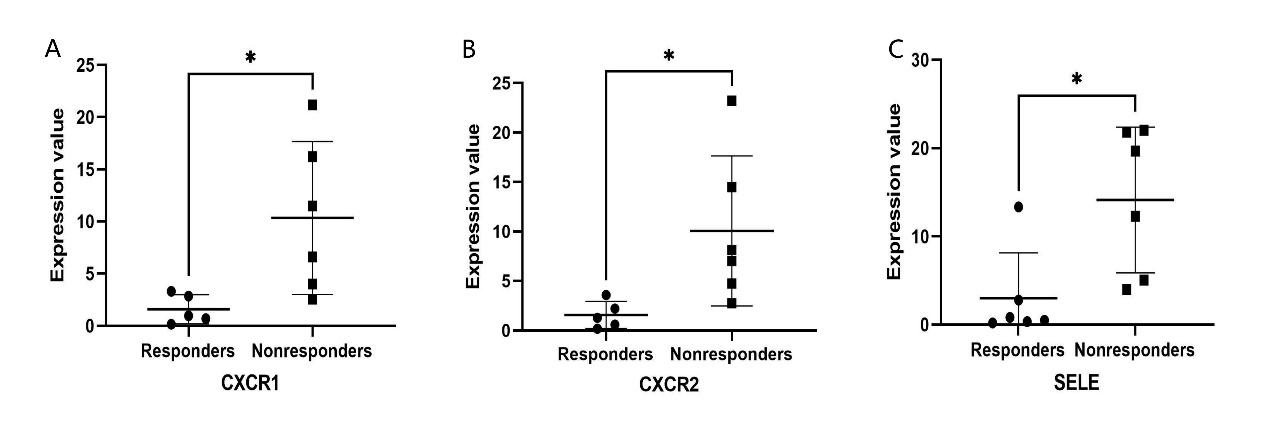


Supplementary Figure 1

**(A)** The expression of CXCR1. **(B)** The expression of CXCR2. **(C)** The expression of SELE. *P<0.05.
